# Supplementary material
Source: PubMed Central journal article supplement (PMC8514055)
Supplement: NIHMS1738279-supplement-Supplemental_Material_2.pdf [file NIHMS1738279-supplement-Supplemental_Material_2.pdf]

**Supplementary Table 1.** Features of step and impulse responses for person-specific models for weekends.

| ID     | mm_we_ss | mm_we_rt | mm_we_st | mm_we_eft | mm_we_pmag | mm_we_pdel | sl_we_ss | sl_we_rt | sl_we_st | sl_we_eft | sl_we_pmag | sl_we_pdel | cn_we_ss | cn_we_rt | cn_we_st | cn_we_eft | cn_we_pmag | cn_we_pdel |
|--------|----------|----------|----------|-----------|------------|------------|----------|----------|----------|-----------|------------|------------|----------|----------|----------|-----------|------------|------------|
| aim101 | 152.05   | 120      | 195      | 15        | 47.44      | 60         | -142.24  | 60       | 135      | 600       | 48.8       | 45         | -189.38  | 75       | 150      | 600       | 59.04      | 0          |
| aim102 | 178.87   | 30       | 105      | 600       | 59.26      | 15         | -49.76   | 0        | 165      | 600       | 46.24      | 0          | -279.07  | 105      | 180      | 600       | 70.29      | 0          |
| aim103 | -75.22   | 210      | 255      | 75        | 37.16      | 60         | 75.79    | 135      | 165      | 600       | 24.04      | 15         | -144.85  | 165      | 225      | 60        | 60.5       | 0          |
| aim105 | -55.05   | 15       | 225      | 15        | 35.25      | 30         | 219.16   | 225      | 285      | 600       | 55.79      | 0          | -287.08  | 180      | 270      | 600       | 64.11      | 0          |
| aim108 | -226.68  | 150      | 180      | 15        | 46.51      | 45         | -287.12  | 150      | 180      | 15        | 81.93      | 45         | -236.17  | 90       | 165      | 15        | 60.48      | 0          |
| aim109 | 5.02     | 0        | 240      | 45        | 28.03      | 30         | -101.8   | 120      | 150      | 600       | 50.29      | 0          | -25.16   | 105      | 240      | 60        | 34.4       | 0          |
| aim110 | -160.92  | 30       | 135      | 15        | 63.08      | 15         | 155.97   | 120      | 225      | 75        | 84.32      | 60         | -265.4   | 90       | 195      | 30        | 76.32      | 30         |
| aim111 | 125.33   | 135      | 150      | 15        | 52.36      | 60         | 157.08   | 90       | 135      | 15        | 45.59      | 30         | -98.03   | 30       | 105      | 15        | 59.94      | 30         |
| aim112 | -147.6   | 30       | 75       | 600       | 73.01      | 0          | 176.61   | 105      | 135      | 600       | 44.46      | 45         | 29.42    | 15       | 180      | 600       | 61.12      | 0          |
| aim113 | 232.56   | 135      | 210      | 600       | 54.58      | 15         | -95.45   | 120      | 165      | 600       | 30.13      | 0          | -306.52  | 135      | 210      | 600       | 58.72      | 45         |
| aim114 | -10.77   | 105      | 270      | 75        | 48.89      | 0          | 168.25   | 105      | 150      | 600       | 52.06      | 15         | -106.96  | 75       | 120      | 600       | 50.24      | 15         |
| aim115 | 139.79   | 15       | 105      | 600       | 68.42      | 0          | 42.37    | 0        | 135      | 180       | 44.85      | 15         | -467.42  | 75       | 120      | 600       | 111.91     | 60         |
| aim116 | 116.36   | 105      | 120      | 30        | 36.09      | 0          | 160.99   | 105      | 120      | 30        | 55.62      | 0          | -68.91   | 60       | 75       | 45        | 95.39      | 30         |
| aim117 | 114.32   | 90       | 180      | 45        | 67.75      | 45         | 162.56   | 120      | 150      | 30        | 38.29      | 60         | 188.84   | 90       | 120      | 120       | 50.06      | 0          |
| aim118 | 55.84    | 15       | 195      | 390       | 57.59      | 15         | 55.74    | 120      | 225      | 60        | 65.12      | 45         | 14.25    | 0        | 240      | 105       | 39.84      | 0          |
| aim119 | -28.7    | 135      | 180      | 15        | 26.65      | 30         | -69.01   | 90       | 165      | 15        | 16.75      | 60         | 54.68    | 120      | 165      | 15        | 49.51      | 30         |
| aim120 | 5.7      | 15       | 165      | 30        | 30.53      | 0          | 131.3    | 90       | 195      | 15        | 63.68      | 60         | 108.29   | 120      | 180      | 15        | 28.83      | 60         |
| aim121 | -3.41    | 0        | 255      | 90        | 20.41      | 60         | -51.62   | 15       | 165      | 600       | 45.47      | 30         | 9.72     | 0        | 180      | 120       | 25.26      | 30         |
| aim122 | 132.62   | 120      | 180      | 15        | 53.34      | 45         | 182.59   | 120      | 195      | 15        | 47.43      | 45         | 65.2     | 30       | 90       | 90        | 40.09      | 0          |
| aim123 | 147.63   | 105      | 135      | 15        | 40.91      | 60         | 9.34     | 0        | 180      | 15        | 38         | 0          | 497.47   | 75       | 150      | 15        | 167.43     | 60         |
| aim124 | 76.49    | 105      | 180      | 15        | 46.92      | 15         | -251.21  | 165      | 225      | 15        | 33.84      | 60         | -181.91  | 165      | 240      | 15        | 43.34      | 60         |
| aim125 | 146.5    | 210      | 255      | 30        | 31.41      | 60         | -107.2   | 165      | 240      | 15        | 23.49      | 30         | -139.9   | 165      | 255      | 600       | 37.18      | 60         |
| aim126 | 273.81   | 135      | 180      | 345       | 52.78      | 0          | 155.66   | 150      | 195      | 15        | 51.69      | 45         | 138.87   | 135      | 255      | 15        | 48.05      | 60         |
| aim127 | 18.76    | 0        | 135      | 60        | 20.59      | 0          | -28.46   | 90       | 120      | 30        | 8.94       | 30         | -34.67   | 0        | 75       | 15        | 19.67      | 45         |
| aim128 | -338.48  | 105      | 180      | 600       | 77.88      | 60         | 238.01   | 120      | 150      | 600       | 64.02      | 30         | 77.77    | 15       | 165      | 600       | 87.32      | 0          |
| aim130 | -45.66   | 0        | 135      | 30        | 49.17      | 0          | 136.66   | 135      | 165      | 15        | 53.08      | 60         | 300.98   | 90       | 135      | 15        | 89.43      | 15         |
| aim131 | -0.06    | 0        | 225      | 30        | 18.04      | 0          | 62.83    | 75       | 90       | 30        | 28.24      | 45         | 93.19    | 45       | 90       | 600       | 50.8       | 0          |
| aim132 | -285.89  | 210      | 330      | 30        | 48.41      | 45         | 128.8    | 255      | 315      | 45        | 35.6       | 45         | -144.67  | 195      | 360      | 75        | 54.71      | 60         |
| aim133 | -183.21  | 45       | 135      | 30        | 64.22      | 60         | 1.34     | 0        | 210      | 15        | 23.96      | 45         | 550.72   | 60       | 75       | 600       | 140.92     | 0          |
| aim134 | 92.02    | 75       | 90       | 30        | 46.01      | 30         | -8.5     | 30       | 135      | 60        | 49.87      | 0          | 45.09    | 30       | 105      | 15        | 34.52      | 15         |
| aim135 | -38.44   | 15       | 105      | 15        | 46.87      | 15         | 222.71   | 75       | 105      | 600       | 75.28      | 45         | 25.51    | 0        | 165      | 75        | 80.25      | 0          |
| aim136 | 120.81   | 90       | 150      | 30        | 81.6       | 15         | 145.09   | 90       | 135      | 600       | 45.85      | 45         | -401.48  | 75       | 150      | 600       | 111.9      | 45         |
| aim137 | 204.43   | 75       | 135      | 15        | 68.19      | 30         | 504.76   | 105      | 120      | 480       | 98.81      | 30         | -161.92  | 30       | 75       | 15        | 70.97      | 30         |
| aim138 | -174.08  | 90       | 120      | 420       | 44.8       | 0          | -101.25  | 30       | 75       | 150       | 44.5       | 0          | 128.81   | 15       | 75       | 15        | 111.32     | 15         |
| aim139 | 47.21    | 15       | 165      | 15        | 72.8       | 15         | 363.94   | 75       | 90       | 240       | 106.42     | 30         | 501.6    | 60       | 60       | 435       | 197.33     | 15         |
| aim140 | 34.46    | 105      | 150      | 15        | 14.17      | 15         | -95.77   | 30       | 120      | 225       | 37.45      | 15         | -129.96  | 45       | 75       | 30        | 57.24      | 30         |
| aim141 | 332.93   | 60       | 150      | 600       | 105.16     | 60         | -180.07  | 60       | 165      | 600       | 69.74      | 60         | -176.86  | 90       | 135      | 600       | 42.28      | 0          |
| aim142 | 113.85   | 135      | 180      | 15        | 48.01      | 45         | 301      | 135      | 165      | 255       | 59         | 0          | 327.15   | 120      | 195      | 15        | 78.06      | 15         |
| aim143 | 365.11   | 60       | 120      | 600       | 95.26      | 30         | -21.44   | 165      | 195      | 15        | 24.81      | 0          | -203.05  | 60       | 150      | 15        | 52.97      | 60         |
| aim144 | -69.2    | 150      | 180      | 15        | 28.32      | 45         | -7.69    | 105      | 270      | 120       | 32.15      | 0          | 113      | 150      | 180      | 15        | 35.08      | 60         |
| aim145 | 60.54    | 30       | 120      | 15        | 30.57      | 30         | 76.86    | 15       | 75       | 15        | 50         | 15         | 159.74   | 30       | 120      | 465       | 76.62      | 0          |
| aim146 | 273.8    | 105      | 150      | 600       | 105.45     | 0          | -135.99  | 120      | 210      | 45        | 43.36      | 45         | -82.14   | 120      | 165      | 600       | 32.46      | 45         |
| aim147 | 445.79   | 90       | 105      | 15        | 89.41      | 0          | 281.54   | 75       | 105      | 15        | 80.62      | 0          | 57.89    | 60       | 120      | 15        | 49.09      | 15         |
| aim149 | 39.61    | 60       | 165      | 45        | 29.42      | 60         | -39.24   | 15       | 150      | 60        | 38.91      | 45         | 166.19   | 60       | 135      | 30        | 65.93      | 45         |
| aim150 | -53.97   | 105      | 135      | 15        | 29.82      | 30         | -94.49   | 105      | 120      | 15        | 24.98      | 30         | -42.44   | 120      | 165      | 15        | 21.09      | 60         |

Note. we = weekend, mm = “move more” messages, sl = “sit less” messages, cn = “inspirational quote” messages. ss = steady state, rt = rise time, st = settling time, eft = effective time, pmag = peak magnitude, pdel = peak delay.

**Supplementary Table 2.** Features of step and impulse responses for person-specific models for weekdays.

| ID     | mm_wd_ss | mm_wd_rt | mm_wd_st | mm_wd_eft | mm_wd_pmag | mm_wd_pdel | sl_wd_ss | sl_wd_rt | sl_wd_st | sl_wd_eft | sl_wd_pmag | sl_wd_pdel | cn_wd_ss | cn_wd_rt | cn_wd_st | cn_wd_eft | cn_wd_pmag | cn_wd_pdel |
|--------|----------|----------|----------|-----------|------------|------------|----------|----------|----------|-----------|------------|------------|----------|----------|----------|-----------|------------|------------|
| aim101 | 1.07     | 15       | 150      | 600       | 23.01      | 45         | 40.63    | 30       | 75       | 600       | 21.32      | 15         | -75.76   | 60       | 90       | 600       | 65.23      | 0          |
| aim102 | -263.45  | 120      | 165      | 600       | 43.41      | 60         | 13.74    | 0        | 135      | 15        | 20.88      | 0          | 6.97     | 0        | 150      | 45        | 37.34      | 0          |
| aim103 | 48.08    | 30       | 180      | 60        | 34.9       | 30         | 99.25    | 60       | 135      | 600       | 37.13      | 15         | 52.57    | 15       | 75       | 390       | 65.36      | 0          |
| aim105 | 38.63    | 60       | 135      | 165       | 15.44      | 0          | 85.83    | 150      | 210      | 600       | 23.6       | 0          | -63.36   | 75       | 150      | 465       | 34.73      | 0          |
| aim108 | -107.18  | 75       | 135      | 30        | 49.4       | 15         | -165.42  | 105      | 135      | 300       | 36.85      | 60         | 127.77   | 15       | 105      | 60        | 80.45      | 0          |
| aim109 | -55.2    | 45       | 105      | 600       | 22.26      | 15         | 18.35    | 90       | 180      | 15        | 14.82      | 60         | -34.67   | 90       | 120      | 15        | 21.7       | 15         |
| aim110 | 239.68   | 75       | 105      | 600       | 92.98      | 15         | 50.55    | 45       | 105      | 60        | 35.97      | 0          | -110.41  | 60       | 150      | 30        | 51.97      | 30         |
| aim111 | -141.64  | 75       | 135      | 15        | 43.88      | 45         | -47.46   | 30       | 90       | 15        | 19.6       | 45         | 96.19    | 75       | 150      | 45        | 44.03      | 45         |
| aim112 | 21.67    | 0        | 120      | 15        | 25.38      | 0          | 199.26   | 75       | 105      | 15        | 62.46      | 60         | 28.79    | 30       | 105      | 15        | 37.92      | 45         |
| aim113 | 97.68    | 60       | 90       | 15        | 43.15      | 30         | 180.02   | 45       | 45       | 60        | 65.5       | 0          | 136.63   | 75       | 75       | 15        | 49.41      | 45         |
| aim114 | 42.25    | 45       | 135      | 600       | 33.95      | 60         | 62.52    | 45       | 120      | 600       | 41.58      | 60         | -175.52  | 45       | 90       | 600       | 64.22      | 30         |
| aim115 | -59.51   | 30       | 90       | 600       | 27.04      | 15         | 61.09    | 135      | 150      | 60        | 43.49      | 60         | -56.7    | 60       | 120      | 600       | 40.66      | 15         |
| aim116 | -60.76   | 75       | 150      | 15        | 27.71      | 60         | 8.19     | 0        | 135      | 60        | 50.31      | 15         | 267.67   | 75       | 105      | 600       | 70.39      | 45         |
| aim117 | 55.53    | 45       | 105      | 600       | 38.81      | 15         | -8.09    | 15       | 150      | 45        | 14.95      | 0          | -28.3    | 45       | 150      | 60        | 34.04      | 0          |
| aim118 | 16.98    | 0        | 120      | 195       | 17.18      | 0          | -1.43    | 0        | 360      | 90        | 25.56      | 15         | 86.72    | 45       | 120      | 600       | 42.93      | 15         |
| aim119 | 12.43    | 0        | 150      | 15        | 15.22      | 30         | 122.41   | 90       | 165      | 15        | 54.35      | 15         | 25.38    | 120      | 195      | 15        | 60.53      | 30         |
| aim120 | 26.37    | 15       | 165      | 15        | 15.29      | 30         | 99.65    | 120      | 195      | 15        | 24.98      | 60         | 38.28    | 135      | 180      | 15        | 17.66      | 0          |
| aim121 | 109.04   | 75       | 105      | 105       | 46.6       | 0          | 12.5     | 0        | 90       | 15        | 26.81      | 0          | 226      | 90       | 135      | 450       | 47.09      | 60         |
| aim122 | -49.22   | 105      | 135      | 600       | 16.96      | 15         | 87.34    | 90       | 120      | 600       | 30.19      | 0          | -73.79   | 45       | 105      | 600       | 23.57      | 30         |
| aim123 | 28.82    | 75       | 165      | 15        | 42.2       | 15         | 25.31    | 75       | 180      | 15        | 20.51      | 30         | 242.45   | 75       | 105      | 600       | 67.75      | 0          |
| aim124 | -1.68    | 0        | 300      | 75        | 10.98      | 60         | 15.21    | 90       | 165      | 45        | 16.73      | 0          | 50.81    | 75       | 165      | 15        | 24.81      | 45         |
| aim125 | -119.11  | 150      | 270      | 15        | 32.78      | 60         | 11.4     | 150      | 330      | 15        | 12.02      | 30         | -74.08   | 135      | 285      | 45        | 24.17      | 60         |
| aim126 | 124.93   | 90       | 135      | 15        | 30.16      | 0          | 71.7     | 105      | 120      | 15        | 40.76      | 0          | 100.13   | 105      | 150      | 15        | 34.56      | 60         |
| aim127 | -30.08   | 105      | 135      | 360       | 8.07       | 0          | 5.64     | 90       | 180      | 30        | 7.91       | 0          | -22.51   | 0        | 105      | 210       | 20.48      | 0          |
| aim128 | 19.57    | 105      | 150      | 15        | 45.41      | 60         | 7.93     | 0        | 150      | 75        | 24.34      | 0          | 66.67    | 90       | 105      | 60        | 32.14      | 0          |
| aim130 | 189.83   | 90       | 150      | 15        | 44.62      | 60         | 20.18    | 90       | 195      | 15        | 35.48      | 45         | 165.73   | 45       | 105      | 15        | 63.24      | 15         |
| aim131 | 55.53    | 45       | 75       | 15        | 26.1       | 30         | -26.42   | 45       | 105      | 15        | 11.62      | 45         | 47.21    | 30       | 105      | 15        | 20.52      | 45         |
| aim132 | 173.23   | 150      | 225      | 15        | 31.82      | 60         | -13.21   | 225      | 285      | 15        | 21.26      | 15         | -101.28  | 165      | 225      | 600       | 18.02      | 60         |
| aim133 | 44.65    | 45       | 105      | 15        | 48.36      | 45         | 65.14    | 45       | 90       | 15        | 25.28      | 60         | 92.18    | 30       | 75       | 45        | 58.88      | 30         |
| aim134 | 32.23    | 75       | 135      | 15        | 32.11      | 15         | 137.79   | 75       | 90       | 150       | 44.46      | 0          | 12.99    | 75       | 150      | 15        | 41.34      | 45         |
| aim135 | -97.53   | 60       | 135      | 45        | 43.75      | 45         | -7.38    | 15       | 150      | 15        | 12.02      | 30         | 101.22   | 75       | 120      | 15        | 41.23      | 60         |
| aim136 | 154.07   | 150      | 165      | 30        | 61.24      | 0          | 64.1     | 60       | 120      | 15        | 62.26      | 45         | -14.07   | 0        | 240      | 60        | 76.37      | 0          |
| aim137 | -81.88   | 90       | 120      | 15        | 21.7       | 15         | 12.1     | 0        | 90       | 15        | 27.8       | 0          | -167.16  | 90       | 150      | 15        | 51.67      | 60         |
| aim138 | 29.6     | 0        | 150      | 210       | 34.75      | 60         | -67.37   | 60       | 120      | 45        | 33.55      | 0          | -26.43   | 60       | 90       | 15        | 38.58      | 45         |
| aim139 | 18.95    | 120      | 165      | 15        | 35.59      | 0          | 319.36   | 75       | 105      | 315       | 108.3      | 0          | 139.68   | 15       | 90       | 15        | 110.59     | 30         |
| aim140 | 79.6     | 60       | 90       | 600       | 25.61      | 15         | 12.13    | 30       | 105      | 75        | 20.9       | 60         | -166.66  | 90       | 90       | 600       | 41.58      | 60         |
| aim141 | 95.4     | 30       | 90       | 105       | 45.7       | 0          | 54.45    | 45       | 90       | 15        | 43.52      | 45         | 59.94    | 15       | 120      | 15        | 72.23      | 30         |
| aim142 | -40.95   | 90       | 105      | 30        | 19.07      | 60         | -0.25    | 90       | 195      | 60        | 25.95      | 45         | -45.59   | 105      | 120      | 60        | 65.8       | 0          |
| aim143 | 17.96    | 0        | 195      | 75        | 63.23      | 0          | 85.04    | 90       | 120      | 15        | 27.26      | 0          | 238.63   | 45       | 105      | 600       | 109.11     | 30         |
| aim144 | -33.97   | 120      | 135      | 30        | 11.86      | 45         | -30.82   | 30       | 90       | 375       | 18.8       | 30         | 52.21    | 60       | 105      | 600       | 30.59      | 0          |
| aim145 | 75.34    | 75       | 105      | 30        | 28.91      | 60         | -9.43    | 15       | 120      | 45        | 26.42      | 60         | -186.37  | 75       | 75       | 600       | 51.07      | 0          |
| aim146 | 74.12    | 15       | 75       | 75        | 69.76      | 0          | -221.58  | 105      | 135      | 15        | 57.57      | 60         | -137.05  | 60       | 120      | 15        | 79.87      | 30         |
| aim147 | -14.86   | 15       | 120      | 600       | 65.77      | 45         | -55.35   | 0        | 90       | 600       | 58.2       | 0          | 143.4    | 45       | 75       | 600       | 74.25      | 45         |
| aim149 | 136.15   | 60       | 105      | 15        | 63.39      | 30         | 132.39   | 45       | 60       | 30        | 57.11      | 0          | -34.35   | 0        | 105      | 30        | 50.32      | 0          |
| aim150 | -29.35   | 30       | 150      | 15        | 17.91      | 15         | -148.77  | 105      | 150      | 15        | 37.42      | 45         | -73.75   | 120      | 150      | 15        | 26.66      | 30         |

*Note.* wd = weekday, mm = “move more” messages, sl = “sit less” messages, cn = “inspirational quote” messages. ss = steady state, rt = rise time, st = settling time, eft = effective time, pmag = peak magnitude, pdel = peak delay.
